# Supplementary material for: Mechanism of the two-dimensional WSeTe/Zr2CO2 direct Z-scheme van der Waals heterojunction as a photocatalyst for water splitting
Source: Royal Society of Chemistry journal article supplement (doi:10.1039/d2cp02999e), 2022-01-01
Supplement: d2cp02999e1.pdf [file d2cp02999e1.pdf]

Mechanism of the two-dimensional WSeTe/Zr<sub>2</sub>CO<sub>2</sub> direct Z-scheme van der Waals  
heterojunction as photocatalysts for water splitting

Jiameng Cao,<sup>a</sup> Xianbin Zhang,<sup>a\*</sup> Shihan Zhao<sup>a</sup>, Xiaoyue Lu<sup>a</sup>, Haohao Ma<sup>a</sup>

Jiameng Cao (cjm@stu.xaut.edu.cn),

Xianbin Zhang (1807498999@qq.com), Shihan Zhao (unicornzsh@163.com), Xiaoyue Lu  
(457764033@qq.com), Haohao Ma (mahaohao@stu.xaut.edu.cn)

ORCID Jiameng Cao:0000-0001-9215-0863

ORCID Shihan Zhao: 0000-0002-1295-2872

ORCID Haohao Ma: 0000-0003-3706-1870

<sup>a</sup> Xi'an University of Technology, Xi'an, China

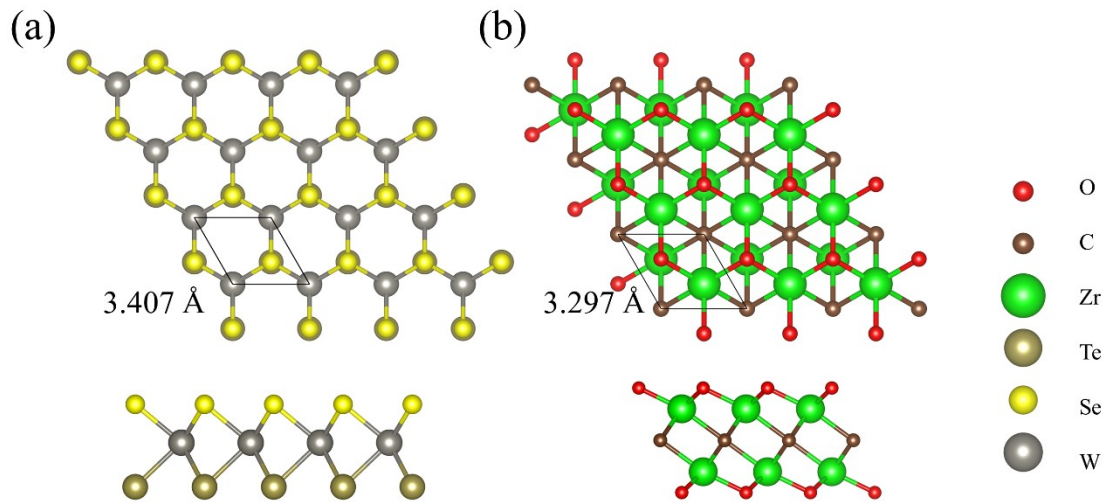

Fig. S1. Top (up) and side (down) views of optimized structures for (a) WSeTe and (b) Zr<sub>2</sub>CO<sub>2</sub> monolayers. The hexagonal structures drawn by black lines represent the unit cells.

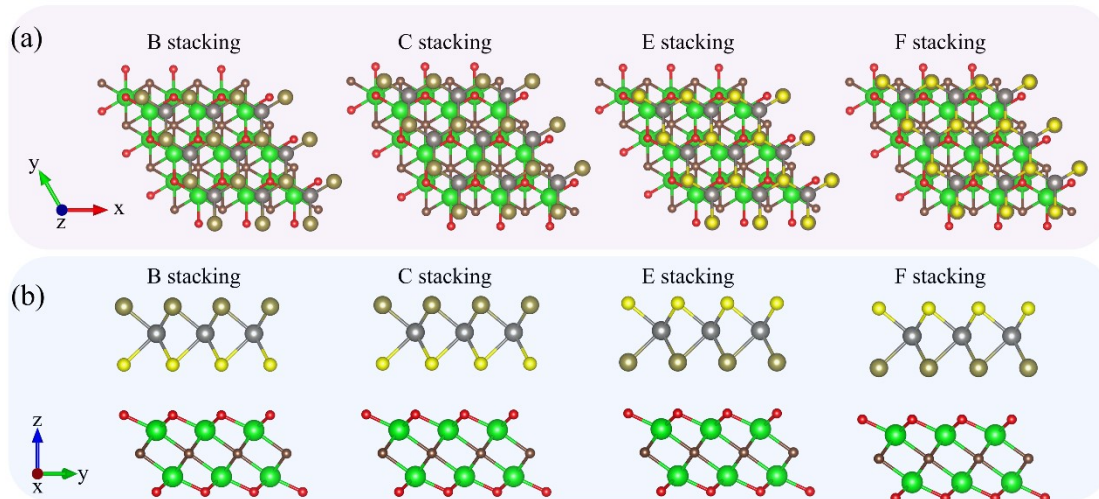

Fig. s2. Top (a) and side (b) views of the optimized structures of the WSeTe/Zr<sub>2</sub>CO<sub>2</sub> heterostructure with different stacking patterns.

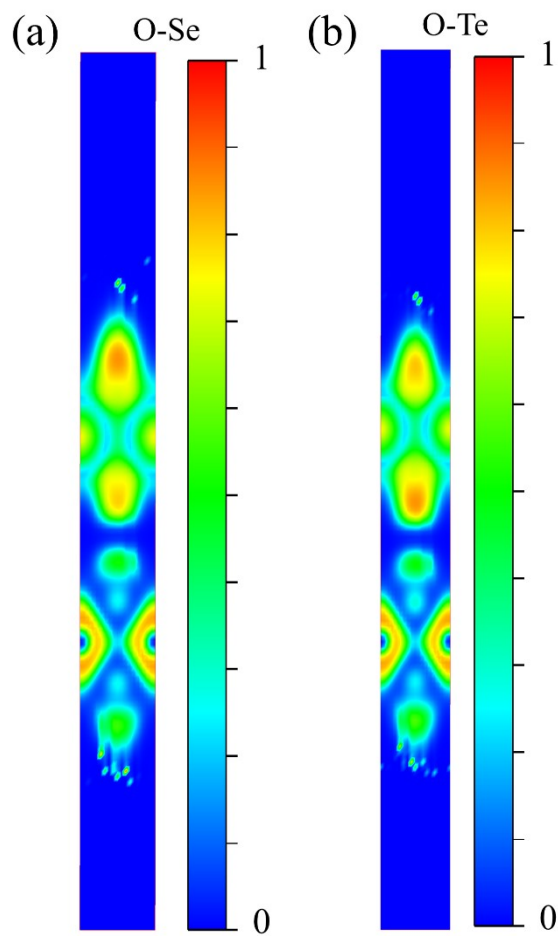

Fig. s3. Electron localization function (ELF) of WSeTe/Zr<sub>2</sub>CO<sub>2</sub> vdW heterostructure of (O-Se) (a) and (O-Te) (b) model, respectively.
